# Supplementary material for: Selecting optimal R6TX2 intermetallics (R = Gd, Tb, Dy; T = Mn, Fe, Co, Ni; X = Sb, Te) for magnetic refrigeration
Source: Royal Society of Chemistry journal article supplement (doi:10.1039/d3dt00223c), 2023-01-01
Supplement: d3dt00223c1.pdf [file d3dt00223c1.pdf]

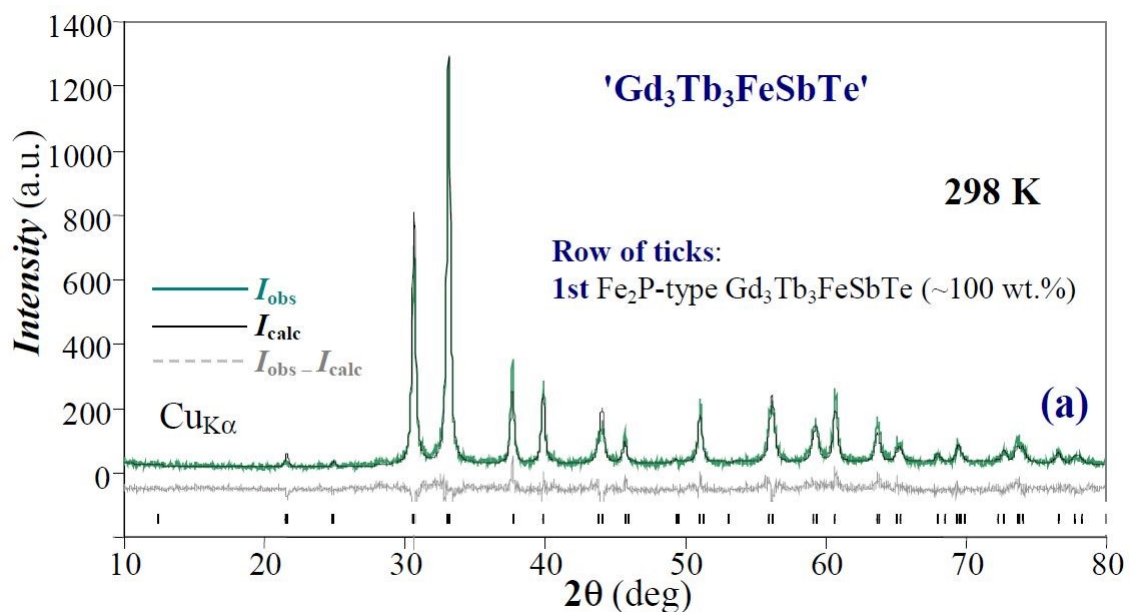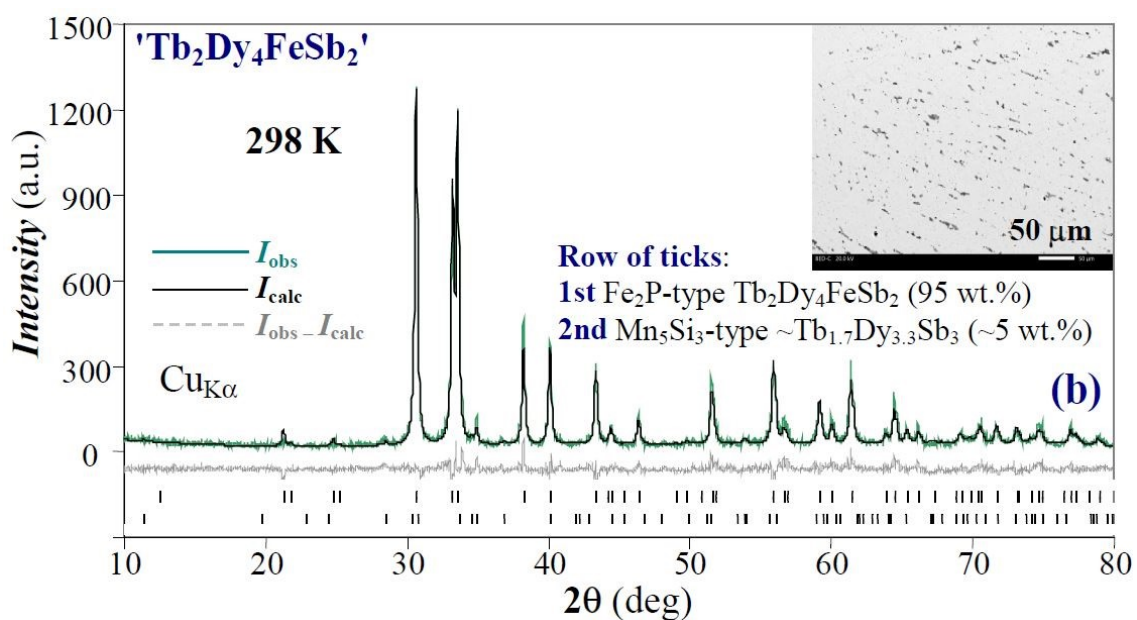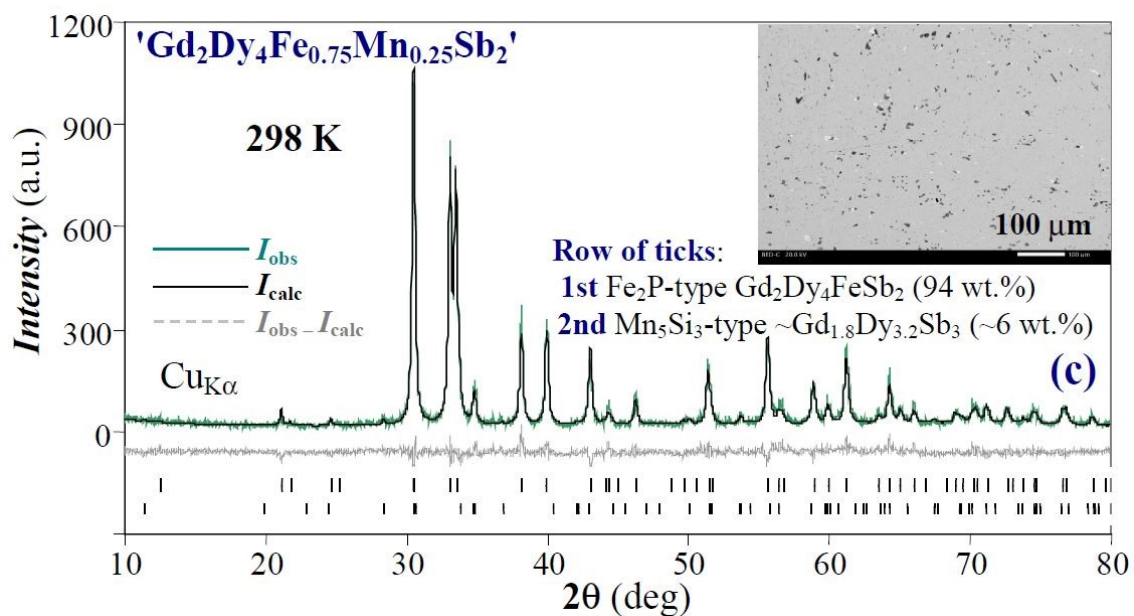

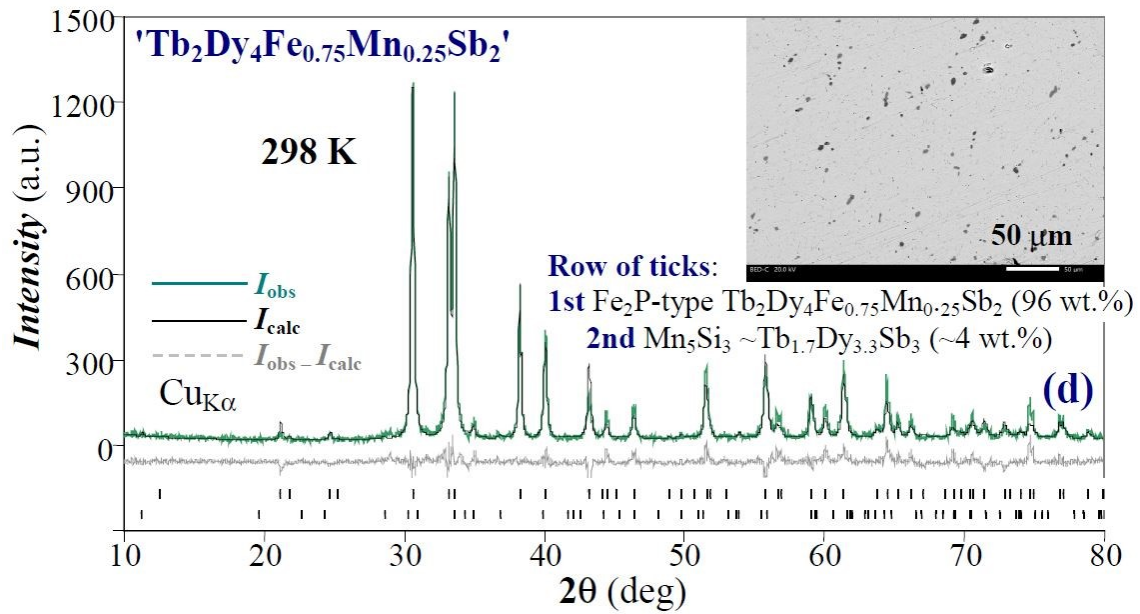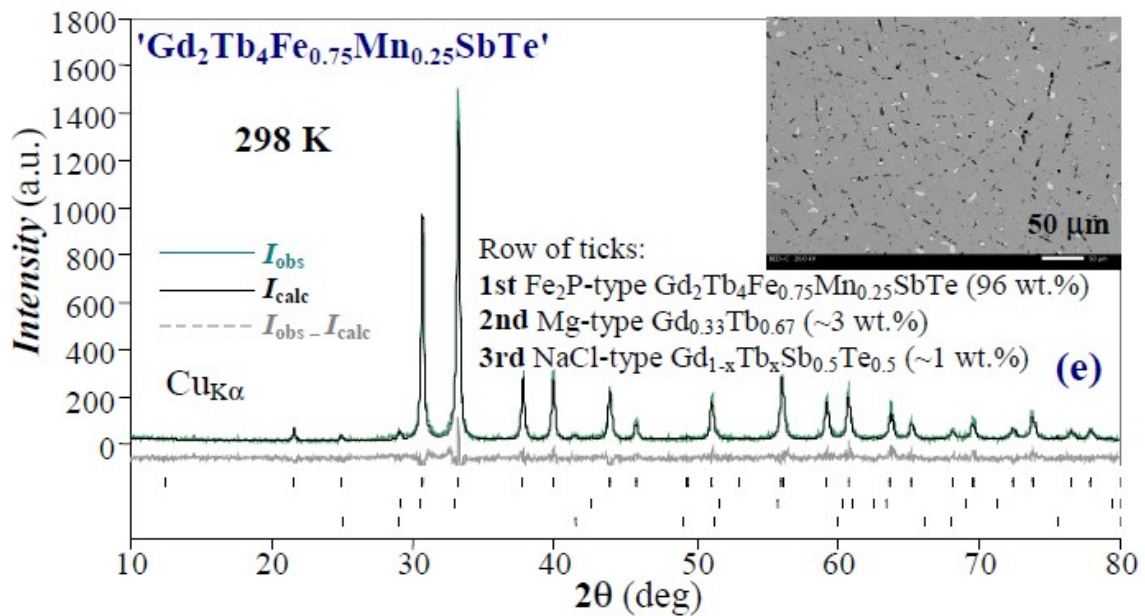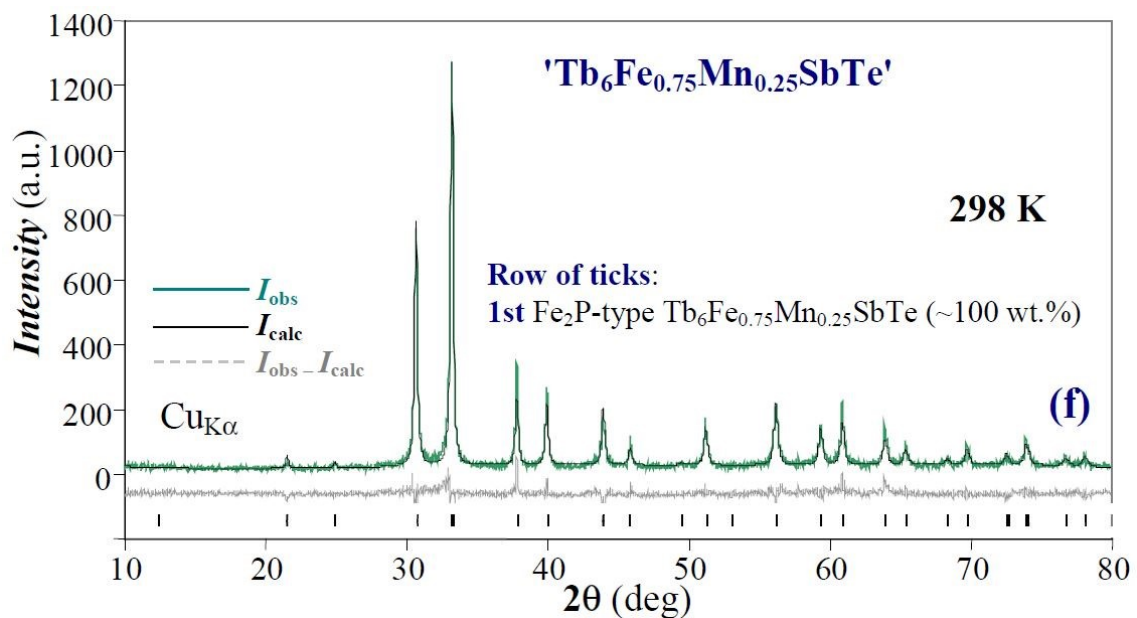

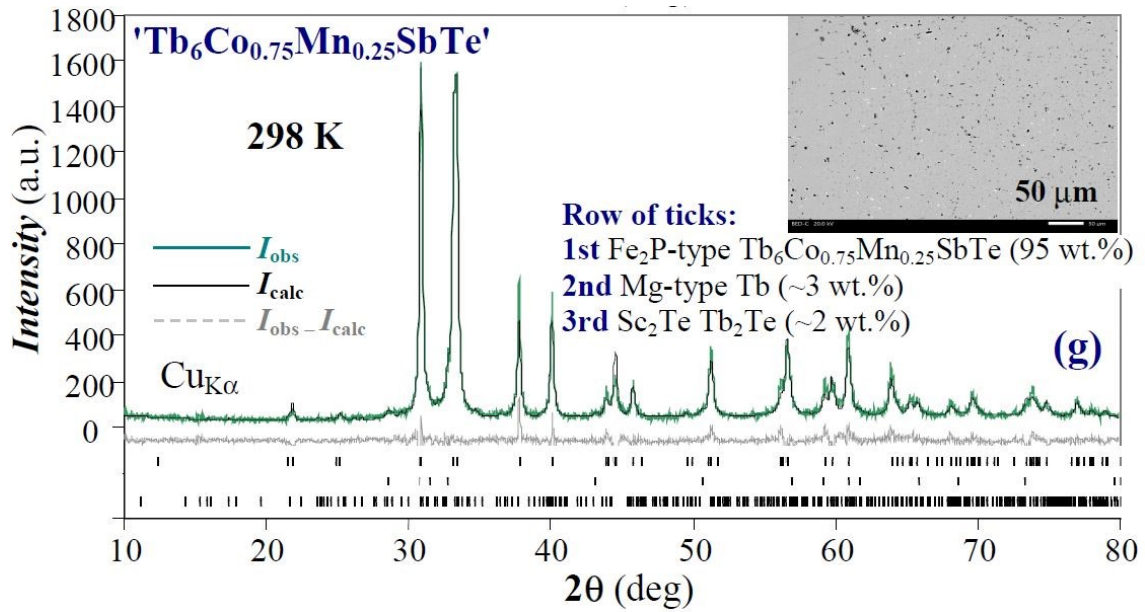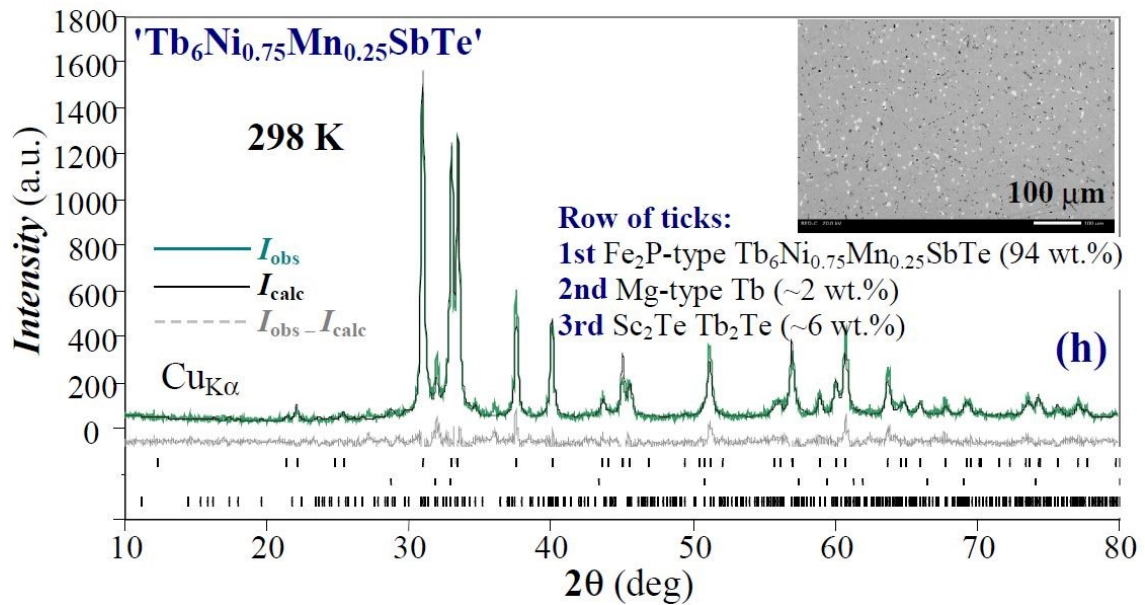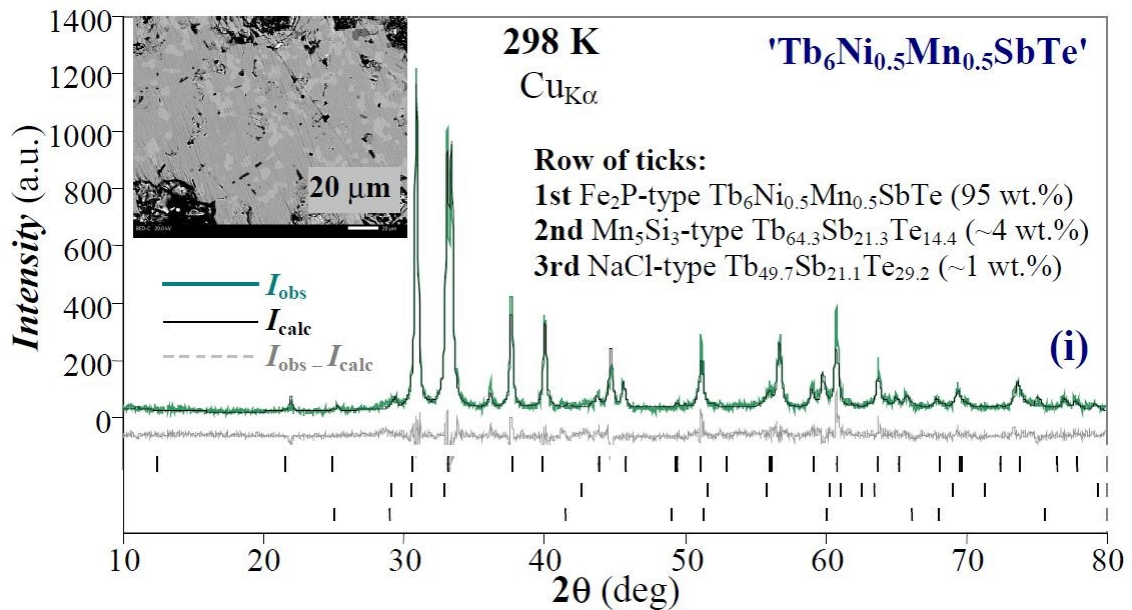



**Figure 1s.** Rietveld refinement of X-ray powder diffraction patterns of (a) 'Gd<sub>3</sub>Tb<sub>3</sub>FeSbTe', (b) 'Tb<sub>2</sub>Dy<sub>4</sub>FeSb<sub>2</sub>', (c) 'Gd<sub>2</sub>Dy<sub>4</sub>Fe<sub>0.75</sub>Mn<sub>0.25</sub>Sb<sub>2</sub>', (d) 'Tb<sub>2</sub>Dy<sub>4</sub>Fe<sub>0.75</sub>Mn<sub>0.25</sub>Sb<sub>2</sub>', (e) 'Gd<sub>2</sub>Tb<sub>4</sub>Fe<sub>0.75</sub>Mn<sub>0.25</sub>SbTe', (f) 'Tb<sub>6</sub>Fe<sub>0.75</sub>Mn<sub>0.25</sub>SbTe', (g) 'Tb<sub>6</sub>Co<sub>0.75</sub>Mn<sub>0.25</sub>SbTe', (h) 'Tb<sub>6</sub>Ni<sub>0.75</sub>Mn<sub>0.25</sub>SbTe' and (i) 'Tb<sub>6</sub>Ni<sub>0.5</sub>Mn<sub>0.5</sub>SbTe'. Inset in **Figures b, c, d, e, g, h** and **i**: microstructure of sample. The references of ticks are marked and compositions of alloys are given in **Figures**.

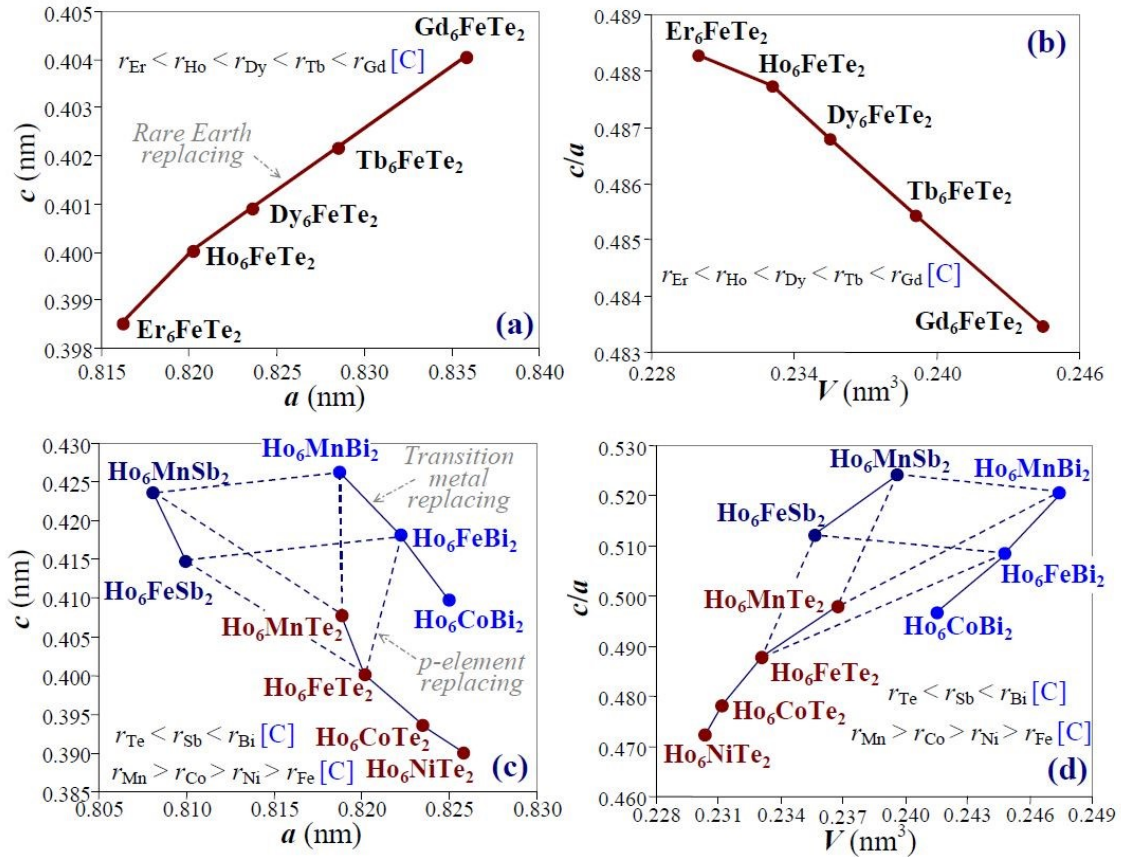

**Figure 2s.** Unit cell data of ternary Fe<sub>2</sub>P-type {Gd-Er}<sub>6</sub>FeTe<sub>2</sub> tellurides: (a) cell parameter  $c$  vs cell parameter  $a$  and (b)  $c/a$  ratio vs unit cell volume  $V$  (replacing of rare earth leads to monotonic increasing of  $a$  and  $c$  cell parameters and unit cell volume  $V$  with slight decreasing of  $c/a$  ratio from Gd<sub>6</sub>FeTe<sub>2</sub> to Er<sub>6</sub>FeTe<sub>2</sub>) and unit cell data of Ho-based Ho<sub>6</sub>{Fe, Mn}Sb<sub>2</sub> antimonides, Ho<sub>6</sub>{Mn-Ni}Te<sub>2</sub> tellurides and Ho<sub>6</sub>{Mn, Fe, Co}Bi<sub>2</sub> bismuthides: (c) cell parameter  $c$  vs cell parameter  $a$  and (d)  $c/a$  ratio vs unit cell volume  $V$ . Despite the increasing of atomic radii from Fe to Mn and from Te to Bi (the sequence of atomic radii is given in **Figures**), the replacing of transition metals leads to increasing of  $a$  cell parameter and decreasing of  $c$  cell parameter, unit cell volume  $V$  and  $c/a$  ratio in the 'Mn-Fe-Co-Ni' row. The replacing of Sb for Bi leads to expansion of unit cell in  $ab$ -plane and its slight expansion along  $c$  axis with increasing of unit cell volume  $V$  and decreasing of  $c/a$  ratio, while replacing of Sb for Te corresponds to the expansion of unit cell in  $ab$ -plane and its compression along  $c$  axis with decreasing of unit cell volume  $V$  and  $c/a$  ratio. The areas of possible transformation of unit cell of the Ho<sub>6</sub>Fe<sub>1-x</sub>Mn<sub>x</sub>Sb<sub>2-y</sub>zTeyBiz quasiternary solid solution are shown in **Figures c** and **d**.

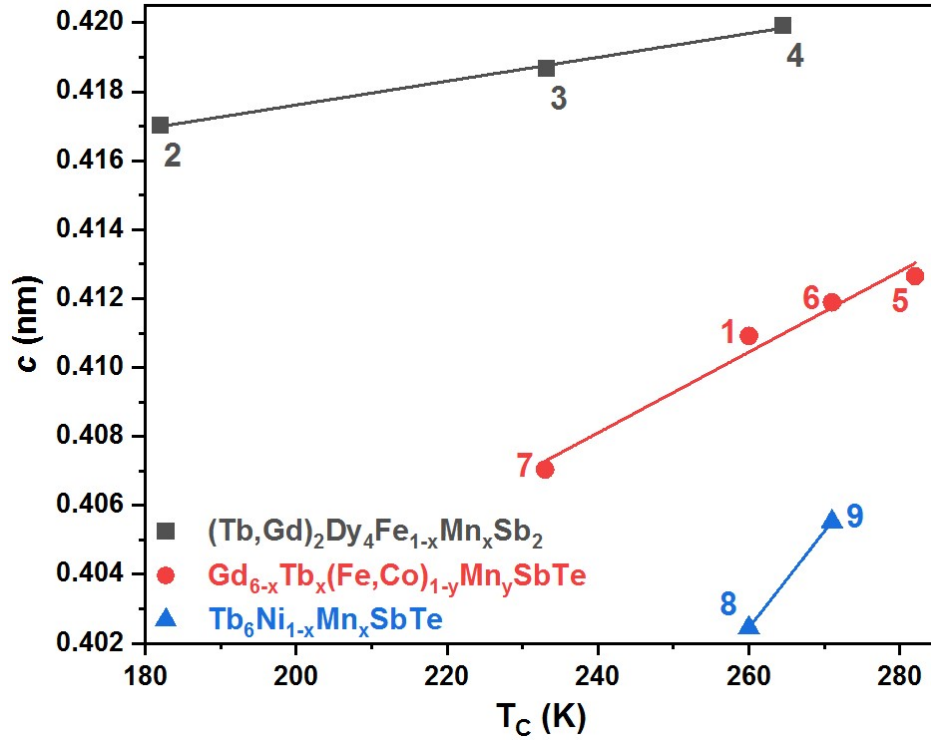

**Figure 3s.** General trends of  $T_C$  temperature with  $c$  cell parameter in  $(\text{Tb,Gd})_2\text{Dy}_4\text{Fe}_{1-x}\text{Mn}_x\text{Sb}_2$  (grey),  $\text{Gd}_{6-x}\text{Tb}_x(\text{Fe,Co})_{1-y}\text{Mn}_y\text{SbTe}$  (red) and  $\text{Tb}_6\text{Ni}_{1-x}\text{Mn}_x\text{SbTe}$  (blue) sub-families. Number labels are the ones used in Tables 1, 2, 3, 4 and Table 1s.

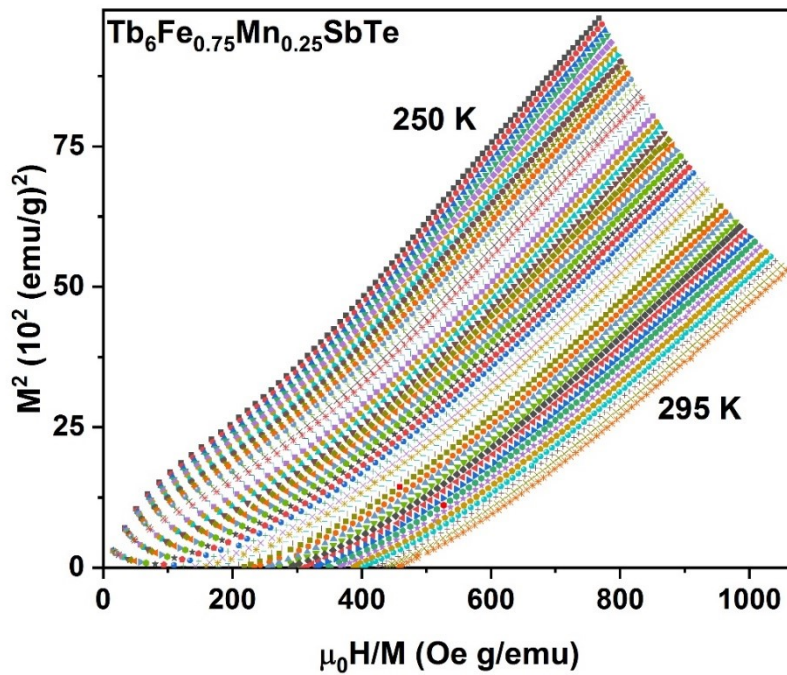

**Figure 4s.** Arrot Plot representation of magnetization isotherms around  $T_C$  for  $\text{Tb}_6\text{Fe}_{0.75}\text{Mn}_{0.25}\text{SbTe}$ . Positive slopes are indicative of the second order nature of this transition.

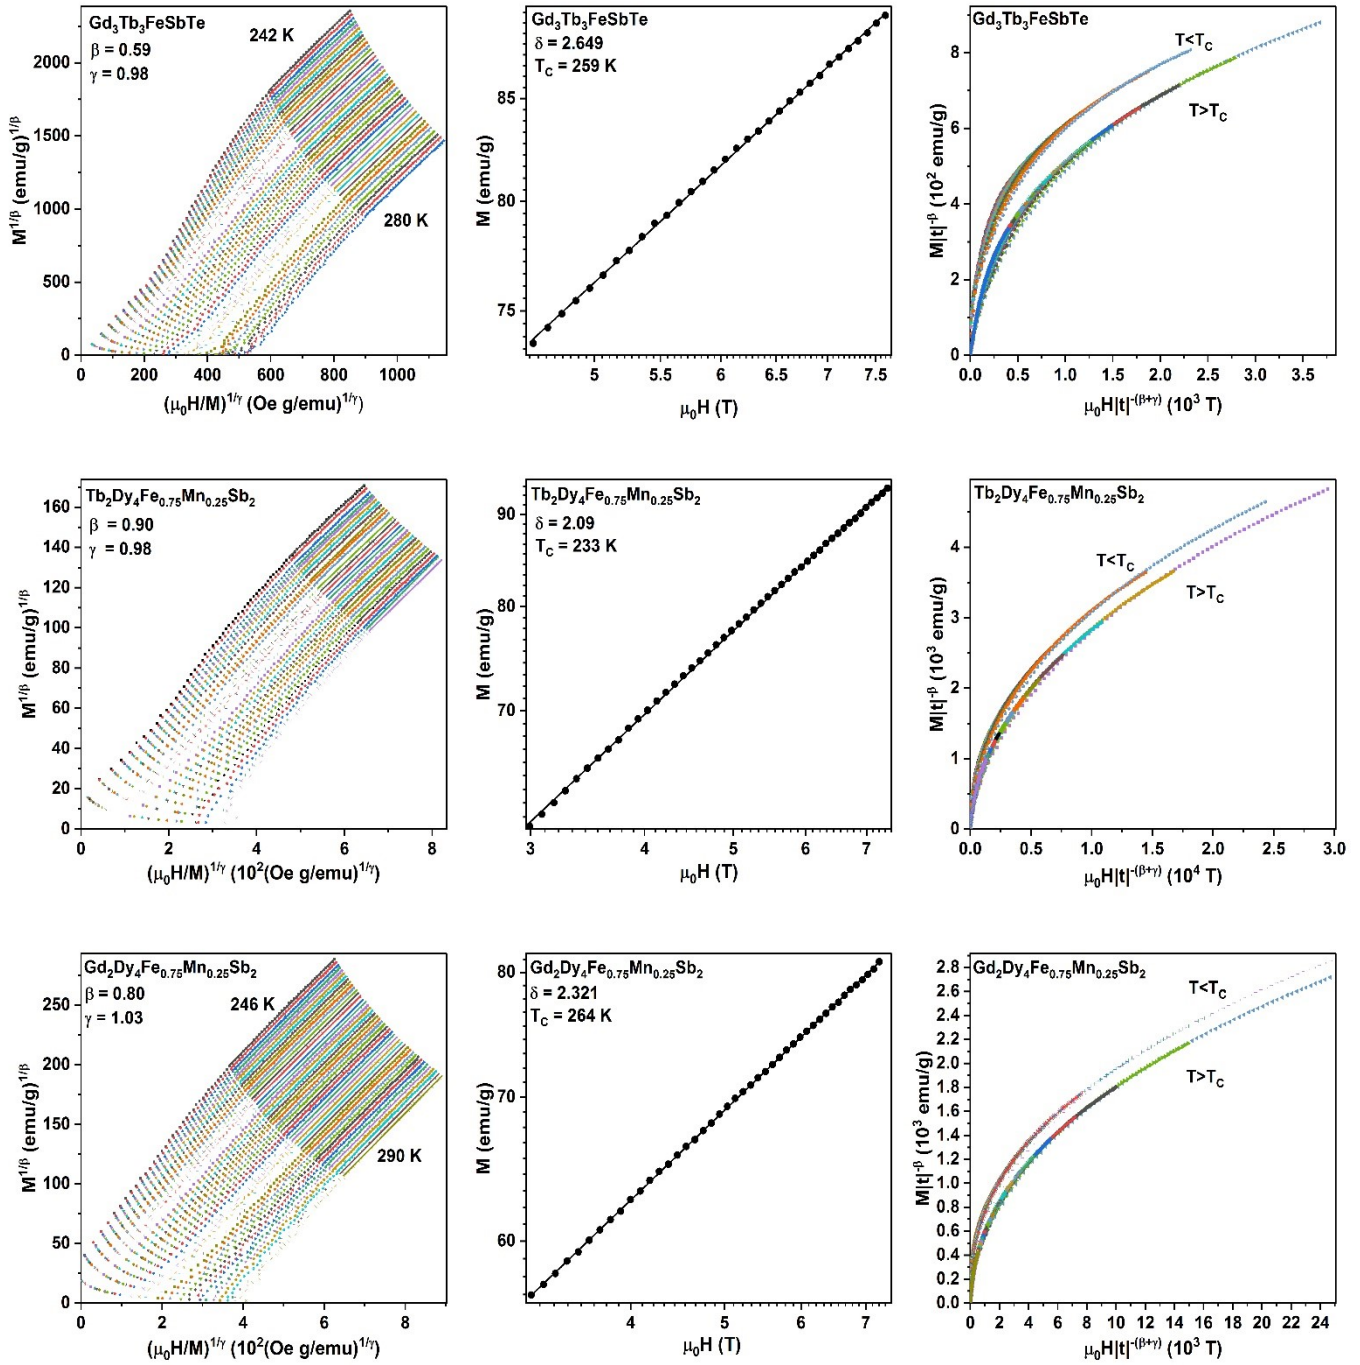

**Figure 5s.** From left to right: Optimized Modified Arrot Plot,  $M$  vs.  $\mu_0 H$  plot in logarithmic scale for the critical isotherm and representation of the magnetic equation of state for Gd<sub>3</sub>Tb<sub>3</sub>FeSbTe (top row), Tb<sub>2</sub>Dy<sub>4</sub>Fe<sub>0.75</sub>Mn<sub>0.25</sub>Sb<sub>2</sub> (middle row) and Gd<sub>2</sub>Dy<sub>4</sub>Fe<sub>0.75</sub>Mn<sub>0.25</sub>Sb<sub>2</sub> (bottom row).

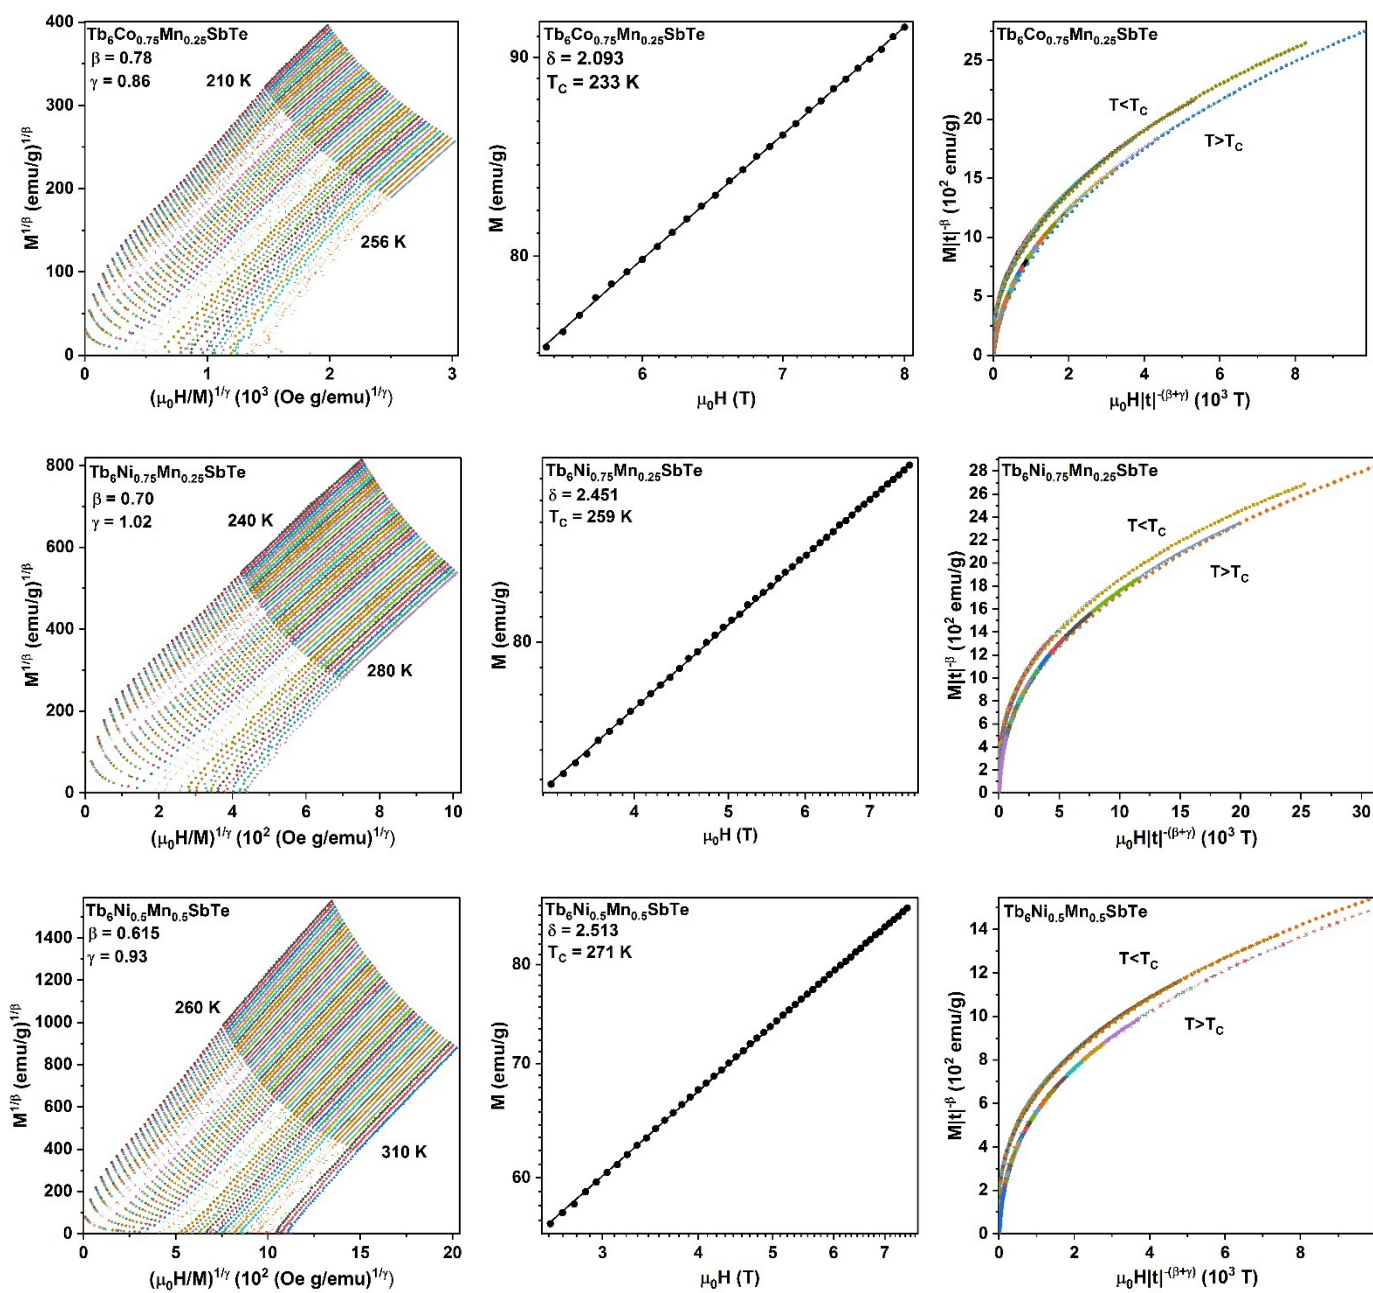

**Figure 6s.** From left to right: Optimized Modified Arrott Plot,  $M$  vs.  $\mu_0 H$  plot in logarithmic scale for the critical isotherm and representation of the magnetic equation of state for  $\text{Tb}_6\text{Co}_{0.75}\text{Mn}_{0.25}\text{SbTe}$  (top row),  $\text{Tb}_6\text{Ni}_{0.75}\text{Mn}_{0.25}\text{SbTe}$  (middle row) and  $\text{Tb}_6\text{Ni}_{0.5}\text{Mn}_{0.5}\text{SbTe}$  (bottom row).



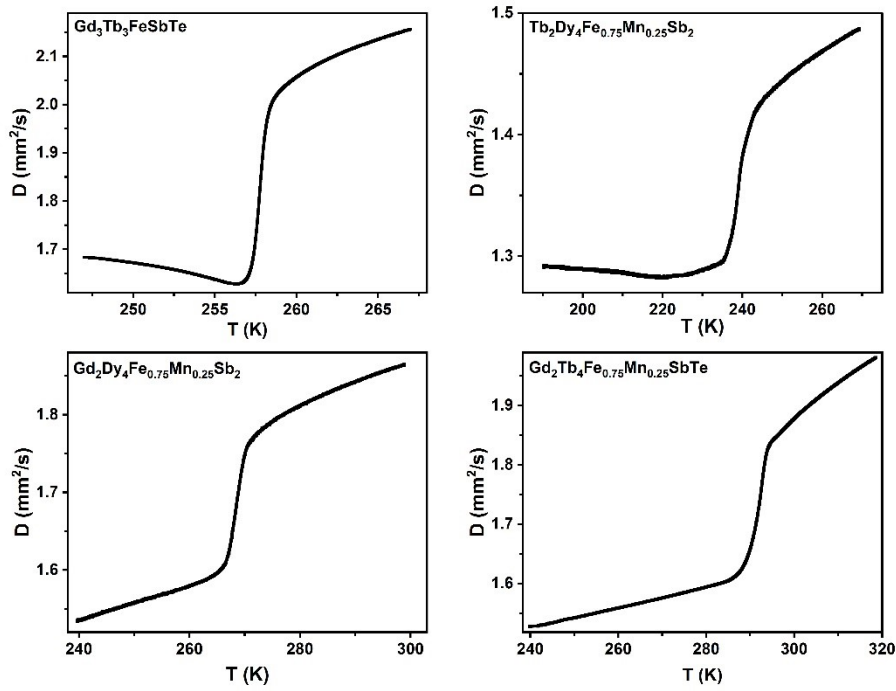

**Figure 7s.** Thermal diffusivity ( $D$ ) as a function of temperature around  $T_C$  for  $\text{Gd}_3\text{Tb}_3\text{FeSbTe}$ ,  $\text{Tb}_2\text{Dy}_4\text{Fe}_{0.75}\text{Mn}_{0.25}\text{Sb}_2$ ,  $\text{Gd}_2\text{Dy}_4\text{Fe}_{0.75}\text{Mn}_{0.25}\text{Sb}_2$  and  $\text{Gd}_2\text{Tb}_4\text{Fe}_{0.75}\text{Mn}_{0.25}\text{SbTe}$ .

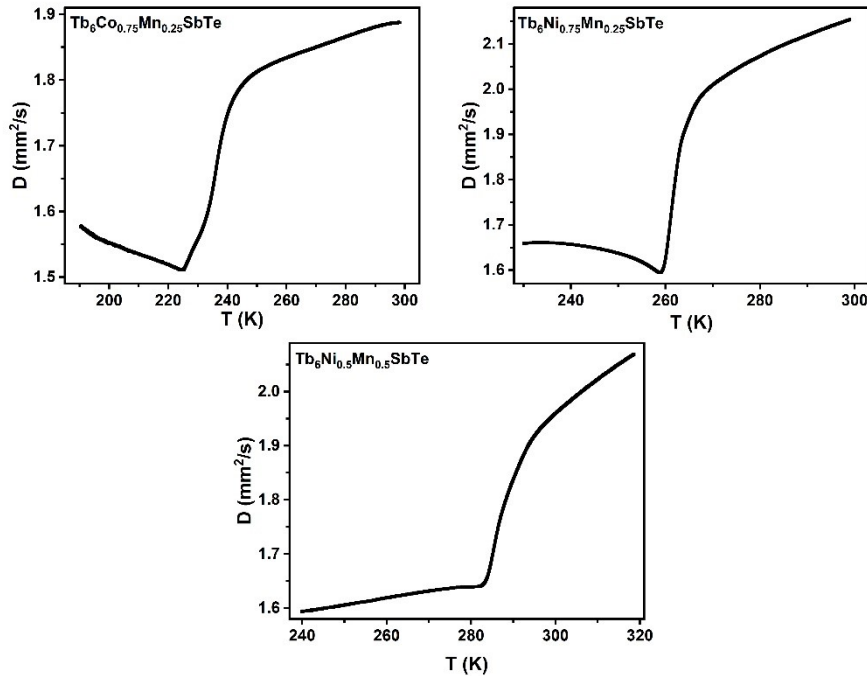

**Figure 8s.** Thermal diffusivity ( $D$ ) as a function of temperature around  $T_C$  for  $\text{Tb}_6\text{Co}_{0.75}\text{Mn}_{0.25}\text{SbTe}$ ,  $\text{Tb}_6\text{Ni}_{0.75}\text{Mn}_{0.25}\text{SbTe}$  and  $\text{Tb}_6\text{Ni}_{0.5}\text{Mn}_{0.5}\text{SbTe}$ .



**Table 1s.** Alloy's content and unit cell data of phases.

| N | Alloy                                                                                    | Phase                                                                                    | wt.% | Type                            | <i>a</i> (nm) | <i>b</i> (nm) | <i>c</i> (nm) | R <sub>F</sub> (%) |
|---|------------------------------------------------------------------------------------------|------------------------------------------------------------------------------------------|------|---------------------------------|---------------|---------------|---------------|--------------------|
| 1 | 'Gd <sub>3</sub> Tb <sub>3</sub> FeSbTe'                                                 | Gd <sub>3</sub> Tb <sub>3</sub> FeSbTe <sup>a-</sup>                                     | ~100 | Fe <sub>2</sub> P               | 0.82712(2)    |               | 0.41051(1)    | 3.6                |
| 2 | 'Tb <sub>2</sub> Dy <sub>4</sub> FeSb <sub>2</sub> '                                     | Tb <sub>2</sub> Dy <sub>4</sub> FeSb <sub>2</sub>                                        | ~95  | Fe <sub>2</sub> P               | 0.81481(5)    |               | 0.41703(2)    | 4.0                |
|   |                                                                                          | ~Tb <sub>1.7</sub> Dy <sub>3.3</sub> Sb <sub>3</sub>                                     | ~5   | Mn <sub>5</sub> Si <sub>3</sub> | 0.8979(6)     |               | 0.6230(3)     | 5.8                |
| 3 | 'Gd <sub>2</sub> Dy <sub>4</sub> Fe <sub>0.75</sub> Mn <sub>0.25</sub> Sb <sub>2</sub> ' | Gd <sub>2</sub> Dy <sub>4</sub> Fe <sub>0.75</sub> Mn <sub>0.25</sub> Sb <sub>2</sub>    | ~94  | Fe <sub>2</sub> P               | 0.81646(6)    |               | 0.41991(3)    | 4.2                |
|   |                                                                                          | ~Gd <sub>1.8</sub> Dy <sub>3.2</sub> Sb <sub>3</sub>                                     | ~6   | Mn <sub>5</sub> Si <sub>3</sub> | 0.8937(4)     |               | 0.6289(3)     | 6.2                |
|   |                                                                                          | ~Gd <sub>0.34</sub> Dy <sub>0.66</sub> <sup>b-</sup>                                     | < 1  | Mg                              |               |               |               |                    |
| 4 | 'Tb <sub>2</sub> Dy <sub>4</sub> Fe <sub>0.75</sub> Mn <sub>0.25</sub> Sb <sub>2</sub> ' | Tb <sub>2</sub> Dy <sub>4</sub> Fe <sub>0.75</sub> Mn <sub>0.25</sub> Sb <sub>2</sub>    | ~96  | Fe <sub>2</sub> P               | 0.81478(6)    |               | 0.41866(3)    | 4.8                |
|   |                                                                                          | ~Tb <sub>1.7</sub> Dy <sub>3.3</sub> Sb <sub>3</sub>                                     | ~4   | Mn <sub>5</sub> Si <sub>3</sub> | 0.8990(9)     |               | 0.6251(4)     | 4.6                |
| 5 | 'Gd <sub>2</sub> Tb <sub>4</sub> Fe <sub>0.75</sub> Mn <sub>0.25</sub> SbTe'             | Gd <sub>2</sub> Tb <sub>4</sub> Mn <sub>0.25</sub> Fe <sub>0.75</sub> SbTe               | ~96  | Fe <sub>2</sub> P               | 0.82577(5)    |               | 0.41265(3)    | 5.6                |
|   |                                                                                          | Gd <sub>0.33</sub> Tb <sub>0.67</sub>                                                    | ~3   | Mg                              | 0.35421(9)    |               | 0.5871(2)     | 4.3                |
|   |                                                                                          | Gd <sub>1-x</sub> Tb <sub>x</sub> Sb <sub>0.5</sub> Te <sub>0.5</sub>                    | ~1   | NaCl                            | 0.6159(3)     |               |               | 3.9                |
|   |                                                                                          | Gd <sub>20.8</sub> Tb <sub>46.6</sub> Sb <sub>0.3</sub> Te <sub>32.3</sub> <sup>b-</sup> | <1   | Sc <sub>2</sub> Te              |               |               |               |                    |
| 6 | 'Tb <sub>6</sub> Fe <sub>0.75</sub> Mn <sub>0.25</sub> SbTe'                             | Tb <sub>6</sub> Fe <sub>0.75</sub> Mn <sub>0.25</sub> SbTe <sup>a-</sup>                 | ~100 | Fe <sub>2</sub> P               | 0.82337(3)    |               | 0.41179(1)    | 4.2                |
| 7 | 'Tb <sub>6</sub> Co <sub>0.75</sub> Mn <sub>0.25</sub> SbTe'                             | Tb <sub>6</sub> Co <sub>0.75</sub> Mn <sub>0.25</sub> SbTe                               | ~95  | Fe <sub>2</sub> P               | 0.82547(6)    |               | 0.40704(2)    | 3.7                |
|   |                                                                                          | Tb                                                                                       | ~3   | Mg                              | 0.3607(2)     |               | 0.5650(3)     | 3.1                |
|   |                                                                                          | Tb <sub>2</sub> Te                                                                       | ~2   | Sc <sub>2</sub> Te              | 2.1988(13)    | 0.3965(2)     | 1.1536(6)     | 4.2                |
| 8 | 'Tb <sub>6</sub> Ni <sub>0.75</sub> Mn <sub>0.25</sub> SbTe'                             | Tb <sub>6</sub> Ni <sub>0.75</sub> Mn <sub>0.25</sub> SbTe                               | ~94  | Fe <sub>2</sub> P               | 0.82927(7)    |               | 0.40245(3)    | 3.9                |
|   |                                                                                          | Tb                                                                                       | ~2   | Mg                              | 0.3597(2)     |               | 0.5612(4)     | 3.4                |
|   |                                                                                          | Tb <sub>2</sub> Te                                                                       | ~4   | Sc <sub>2</sub> Te              | 2.1815(12)    | 0.3971(2)     | 1.1578(4)     | 3.7                |
| 9 | 'Tb <sub>6</sub> Ni <sub>0.5</sub> Mn <sub>0.5</sub> SbTe'                               | Tb <sub>6</sub> Ni <sub>0.5</sub> Mn <sub>0.5</sub> SbTe                                 | ~95  | Fe <sub>2</sub> P               | 0.82840(7)    |               | 0.40553(3)    | 5.4                |
|   |                                                                                          | Tb <sub>64.3</sub> Sb <sub>21.3</sub> Te <sub>14.4</sub>                                 | ~4   | Mn <sub>5</sub> Si <sub>3</sub> | 0.9292(8)     |               | 0.5892(3)     | 6.6                |
|   |                                                                                          | Tb <sub>49.7</sub> Sb <sub>21.1</sub> Te <sub>29.2</sub>                                 | ~1   | NaCl                            | 0.6135(8)     |               |               | 4.0                |

<sup>a-</sup> Crystallographic data used with permission of JCPDS - International Centre for Diffraction Data (USA), <sup>b-</sup> from EDS analysis, only.

**Table 2s.** Theoretical magnetic critical exponents for several universality models.  $d$  dimensionality of the interaction,  $N$  number of spin components,  $\beta$  of spontaneous

| Universality class        | $d$ | $N$ | $\beta$ | $\gamma$ | $\delta$ |
|---------------------------|-----|-----|---------|----------|----------|
| Mean-field                |     |     | 0.5     | 1.0      | 3.0      |
| 2D-Ising                  | 2   | 1   | 0.125   | 1.75     | 14       |
| 3D-Ising                  | 3   | 1   | 0.3265  | 1.237    | 4.79     |
| 3D-XY                     | 3   | 2   | 0.348   | 1.317    | 4.78     |
| 3D-Heisenberg             | 3   | 3   | 0.369   | 1.396    | 4.78     |
| Chiral XY                 | 3   | 2   | 0.253   | 1.13     | 5.47     |
| Chiral-Heisenberg         | 3   | 3   | 0.30    | 1.17     | 4.90     |
| Tricritical Mean<br>Field |     |     | 0.25    | 1.0      | 5.00     |
| 2D-Long range             | 2   | 1   | 0.298   | 1.393    | 5.67     |
| 3D-Ising spin glass       | 3   | 1   | 0.5     | 2.9      | 6.80     |

magnetization,  $\gamma$  of isothermal susceptibility,  $\delta$  of critical isotherm [48-50, 52-57].
